# Supplementary material for: snp-search: simple processing, manipulation and searching of SNPs from high-throughput sequencing
Source: Springer Nature journal article supplement (doi:10.1186/1471-2105-14-326), 2013-11-19

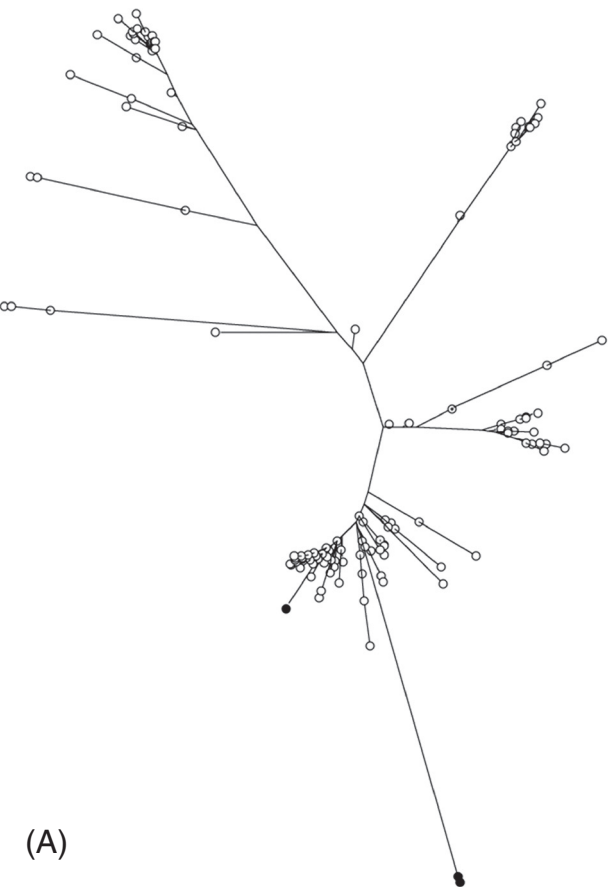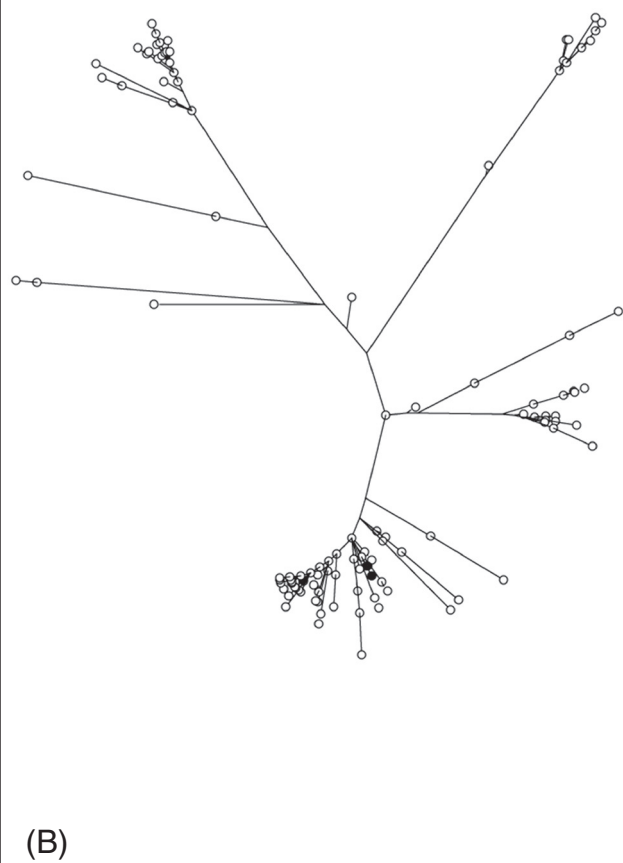

Supplement: 12859_2013_6198_MOESM3_ESM.pdf [file 12859_2013_6198_MOESM3_ESM.pdf]
